# Supplementary material for: Characteristics of Adrenal Incidentalomas in a Large, Prospective Computed Tomography-Based Multicenter Study: The COAR Study in Korea
Source: PubMed Central journal article supplement — Yonsei Med J. 2018 May 3;59(4):501–10. doi: 10.3349/ymj.2018.59.4.501 (PMC5949292; doi:10.3349/ymj.2018.59.4.501), 2018-05-03
Supplement: ymj-59-501-s001.pdf [file ymj-59-501-s001.pdf]

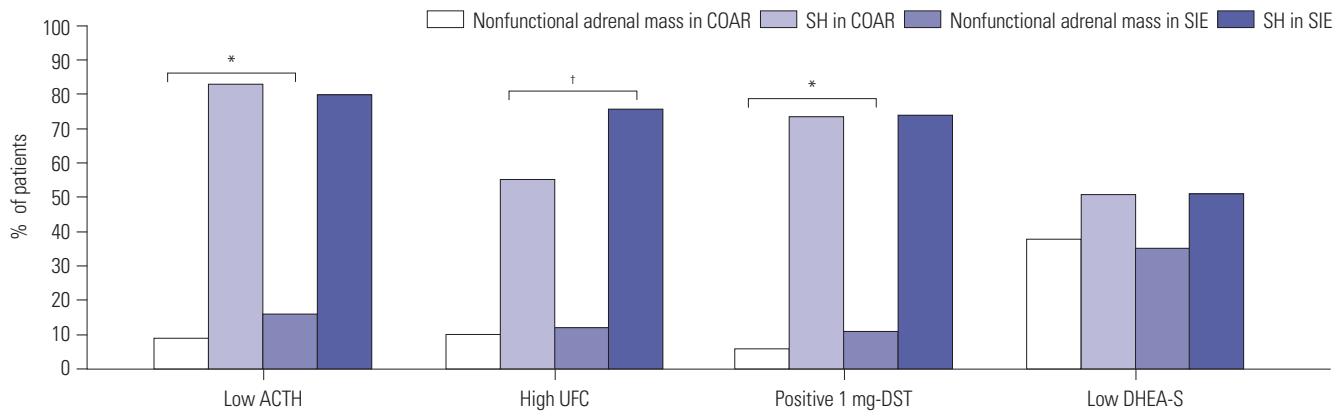

**Supplementary Fig. 1.** The proportion of hypothalamic-pituitary-adrenal axis abnormalities in patients with SH relative to non-functional adrenal masses in the COAR and SIE cohort. To compare the numbers of patients between the COAR and SIE cohorts, chi-square test or Fisher's exact tests were conducted. Data from the SIE cohort were modified according to those reported by Mantero, et al. *J Clin Endocrinol Metab* 2000;85:637-44.<sup>8</sup> \*Nonfunctional adrenal mass in COAR vs. SIE,  $p < 0.05$ , †SH in COAR vs. SIE,  $p < 0.05$ . COAR, Co-work Of Adrenal Research; SIE, Italian Society of Endocrinology; SH, Subclinical Hypercortisolism; ACTH, adrenocorticotrophic hormone; UFC, 24-h urinary free cortisol; 1 mg-DST, 1 mg-dexamethasone suppression test; DHEA-S, dehydroepiandrosterone-sulfate.
