# Supplementary material for: Characteristics of Adrenal Incidentalomas in a Large, Prospective Computed Tomography-Based Multicenter Study: The COAR Study in Korea
Source: PubMed Central journal article supplement — Yonsei Med J. 2018 May 3;59(4):501–10. doi: 10.3349/ymj.2018.59.4.501 (PMC5949292; doi:10.3349/ymj.2018.59.4.501), 2018-05-03
Supplement: ymj-59-501-s002.pdf [file ymj-59-501-s002.pdf]

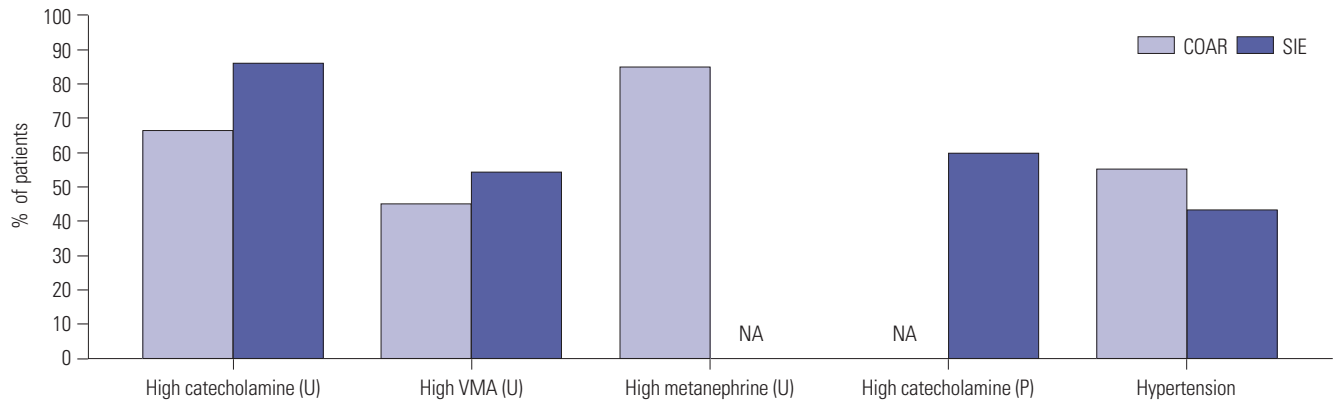

**Supplementary Fig. 2.** Biochemical and clinical characteristics of patients with pheochromocytomas in the COAR and SIE cohorts. To compare the numbers of patients who showed positive hormonal results or had hypertension between the COAR and SIE cohorts, a chi-square test was conducted. Data for the SIE cohort were modified according to those reported by Mantero, et al. *J Clin Endocrinol Metab* 2000;85:637-44.<sup>8</sup> COAR, Co-work Of Adrenal Research; SIE, Italian Society of Endocrinology; VMA, vanillylmandelic acid; U, 24-h urine; P, plasma; NA, not applicable.
