# Supplementary material for: Characteristics of Adrenal Incidentalomas in a Large, Prospective Computed Tomography-Based Multicenter Study: The COAR Study in Korea
Source: PubMed Central journal article supplement — Yonsei Med J. 2018 May 3;59(4):501–10. doi: 10.3349/ymj.2018.59.4.501 (PMC5949292; doi:10.3349/ymj.2018.59.4.501), 2018-05-03
Supplement: ymj-59-501-s004.pdf [file ymj-59-501-s004.pdf]

**Supplementary Table 1.** Prevalence of Comorbidities according to the Functional Classifications of Adrenal Incidentaloma in the COAR Cohort

| <b>Comorbidities</b> | <b>NFAI</b> | <b>SH</b> | <b>Pheo</b> | <b>PA</b> | <b>Others</b> | <b><i>p</i> value<sup>†</sup></b> |
|----------------------|-------------|-----------|-------------|-----------|---------------|-----------------------------------|
| Hypertension         | 404 (48.3)  | 22 (50.0) | 33 (55.0)   | 58 (95.1) | 1 (33.3)      | <0.001                            |
| Diabetes             | 200 (23.9)  | 15 (34.1) | 18 (30.0)   | 13 (21.3) | 2 (68.7)      | 0.164                             |
| Obesity              | 468 (56.0)  | 14 (32.6) | 20 (33.3)   | 30 (49.2) | 0 (0.0)       | <0.001                            |
| Lower bone mass*     | 85 (11.0)   | 9 (23.1)  | 6 (13.3)    | 3 (5.4)   | 0 (0.0)       | 0.091                             |

COAR, Co-work Of Adrenal Research; NFAI, nonfunctional adrenal incidentaloma; SH, subclinical hypercortisolism; Pheo, pheochromocytoma; PA, primary aldosteronism.

Variables are shown as numbers with percentages.

\*Lower bone mass was defined by Z-score  $\leq -2.0$  for premenopausal women and men aged <50 years, T-score  $\leq -2.5$  for postmenopausal women and men aged  $\geq 50$  years,<sup>24</sup> or patients who were taking medications for osteoporosis, <sup>†</sup>*p* values were generated with chi-square test.
