# Supplementary material for: Characteristics of Adrenal Incidentalomas in a Large, Prospective Computed Tomography-Based Multicenter Study: The COAR Study in Korea
Source: PubMed Central journal article supplement — Yonsei Med J. 2018 May 3;59(4):501–10. doi: 10.3349/ymj.2018.59.4.501 (PMC5949292; doi:10.3349/ymj.2018.59.4.501), 2018-05-03
Supplement: ymj-59-501-s005.pdf [file ymj-59-501-s005.pdf]

**Supplementary Table 2.** Diagnostic Power of Different Cutoff Values for Mass Size for the Differentiation of Adrenal Cortical Carcinomas from Benign Masses in the COAR and SIE Cohorts

| Size of mass | COAR | SIE  |
|--------------|------|------|
| 2 cm (%)     |      |      |
| Sensitivity  | 90.3 |      |
| Specificity  | 32.4 |      |
| PPV          | 6.7  |      |
| NPV          | 98.4 |      |
| Accuracy     | 35.4 |      |
| 3 cm (%)     |      |      |
| Sensitivity  | 70.0 |      |
| Specificity  | 61.1 |      |
| PPV          | 8.9  |      |
| NPV          | 97.4 |      |
| Accuracy     | 61.5 |      |
| 4 cm (%)     |      |      |
| Sensitivity  | 60.0 | 93.0 |
| Specificity  | 76.8 | 42.0 |
| PPV          | 12.2 | 16.0 |
| NPV          | 97.3 | 98.1 |
| Accuracy     | 75.9 | NA   |
| 5 cm (%)     |      |      |
| Sensitivity  | 40.0 | 81.0 |
| Specificity  | 85.9 | 63.0 |
| PPV          | 13.3 | 21.0 |
| NPV          | 96.4 | 96.0 |
| Accuracy     | 83.6 | NA   |
| 6 cm (%)     |      |      |
| Sensitivity  | 40.0 | 74.0 |
| Specificity  | 93.0 | 73.0 |
| PPV          | 23.5 | 25.0 |
| NPV          | 96.6 | 96.0 |
| Accuracy     | 90.3 | NA   |

COAR, Co-work Of Adrenal Research; SIE, Italian Society of Endocrinology; PPV, positive predictive value; NPV, negative predictive value; NA, not applicable.

Data of the SIE cohort were modified according to those reported by Mantero, et al. J Clin Endocrinol Metab 2000;85:637-44.<sup>8</sup>
